# Supplementary material for: Self-stratified semiconductor/dielectric polymer blends: vertical phase separation for facile fabrication of organic transistors
Source: Royal Society of Chemistry journal article supplement (doi:10.1039/c3tc30257a), 2013-01-01
Supplement: c3tc30257a.pdf [file c3tc30257a.pdf]

## Supporting Information

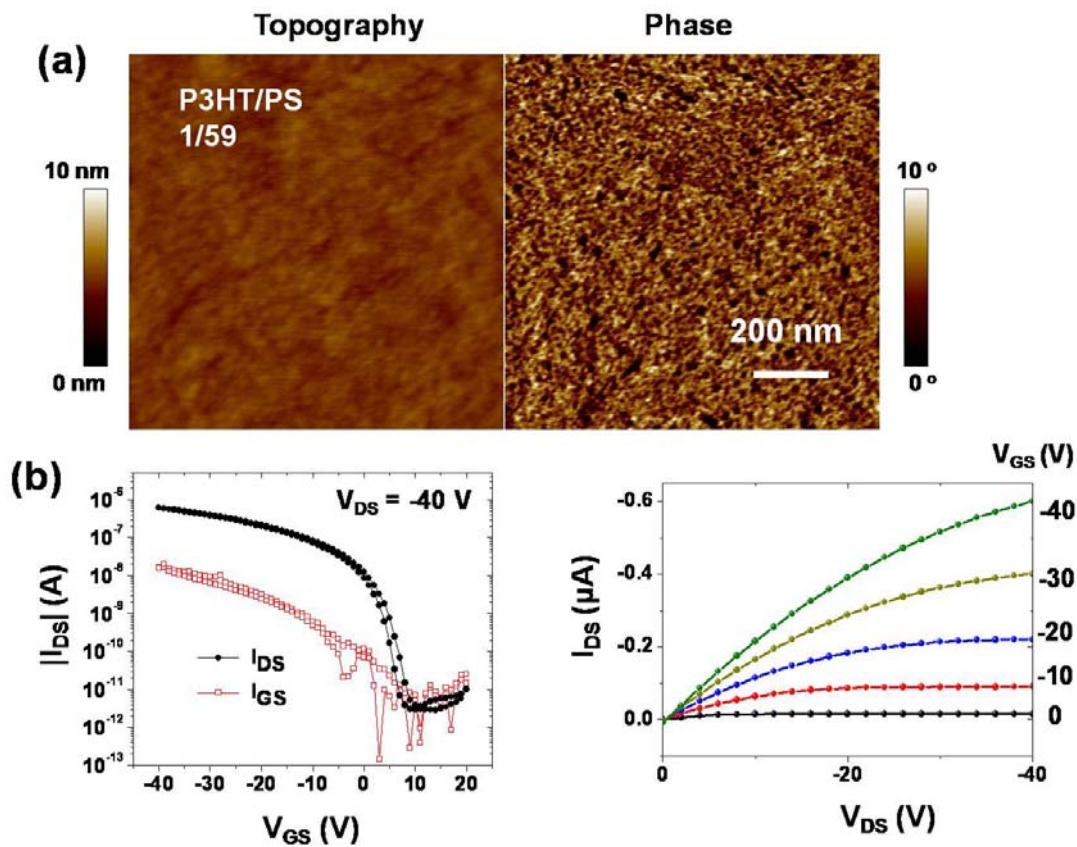

**Figure S1.** (a) AFM images of P3HT/PS blend films prepared from solution containing 6 wt% P3HT/PS (1/59 w/w). (b) Transfer (left) and output (right) characteristics of field-effect transistors based on P3HT/PS blends.

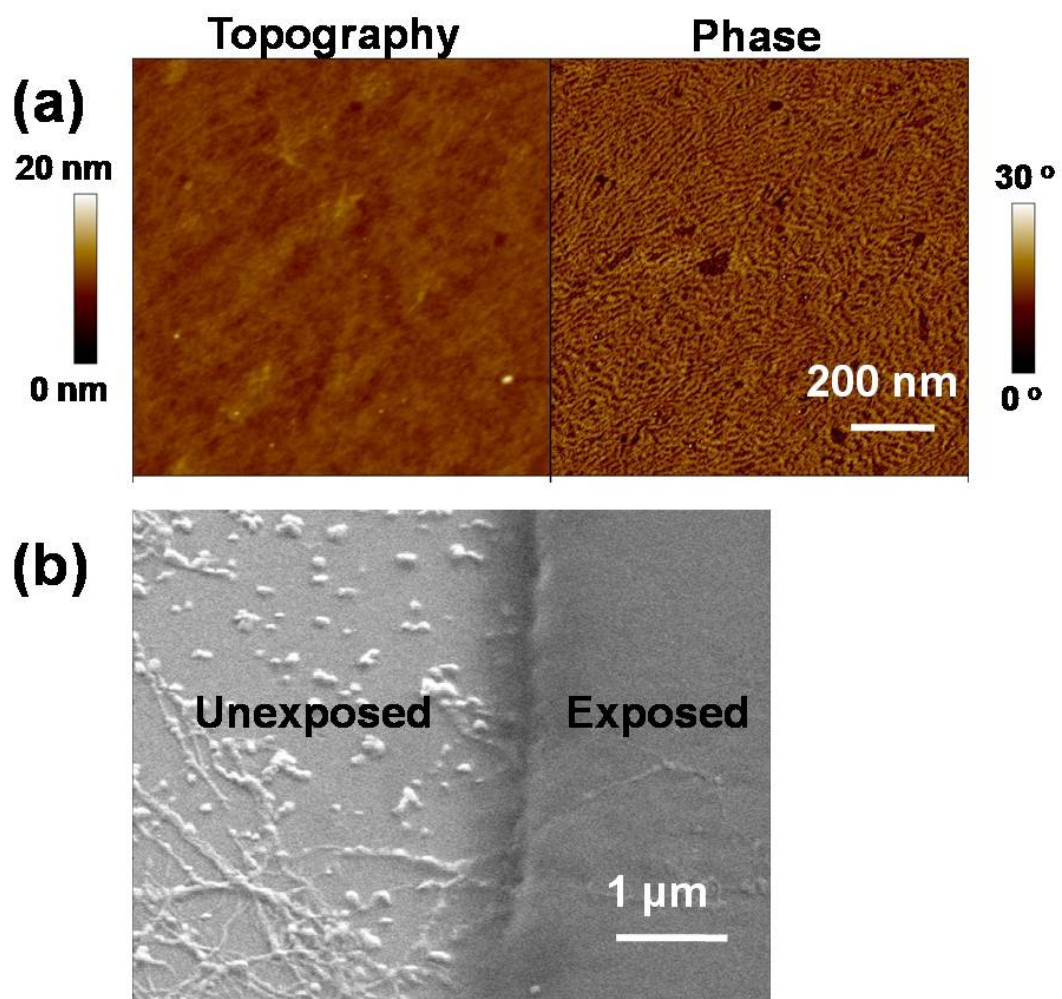

**Figure S2.** (a) AFM images of P3HT/SU-8 photoresist blend films. (b) SEM images of P3HT/SU-8 photoresist blend films after UV exposure and development using cyclohexanone.
